# Supplementary material
Source: publisher figshare collection journal article supplement (https://acs.figshare.com/ndownloader/files/6499653)
Supplement: Supplementary file 1 [file 6499653]

## Supporting Information

### **Controllable Self-Assembly of Amphiphilic Dendrimers at Silica Surface: Effect of Molecular Topological Structure and Salinity**

Minghui Zhang,<sup>†,‡</sup> Jinben Wang,<sup>\*,†</sup> Pei Zhang<sup>\*,†</sup>

<sup>†</sup> *Beijing National Laboratory for Molecular Sciences, Key Laboratory of Colloid, Interface and Chemical Thermodynamics, Institute of Chemistry, Chinese Academy of Sciences, Beijing 100190, P. R. China*

<sup>‡</sup> *University of Chinese Academy of Sciences, Beijing 100049, P.R.China*

\*E-mail: jbwang@iccas.ac.cn, Phone: 86-10-62523395, Fax: 86-10-62523395.

\*E-mail: zhangpei@iccas.ac.cn. Phone: 86-10-62652659. Fax: 86-10-62523395.

## 1. Experimental Section

**1.1.  $G_n$ QPAMC<sub>m</sub> synthesis.** The  $G_n$ QPAMC<sub>12</sub> was synthesized using 0.5 G, 1.5 G and 2.5 G PAMAM as core material. The tertiary amine was introduced by reacting with N,N-Dimethyl-1,2-ethanediamine. Then, the tertiary amine groups react with 1-bromododecane to form quaternary ammonium compound. All the products were recrystallized by acetone/ethanol repeatedly and characterized by <sup>1</sup>H NMR. Taking  $G_1$ QPAMC<sub>12</sub> for example, a scheme of the reaction is shown in Scheme S1.

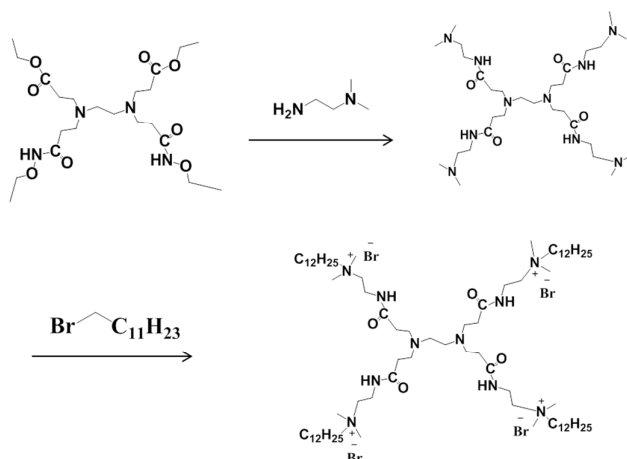

**Scheme S1.** The synthesis pathway of amphiphilic dendrimers  $G_1$ QPAMC<sub>12</sub>.

**$G_1$ QPAMC<sub>12</sub>:** <sup>1</sup>H NMR (400 MHz, CDCl<sub>3</sub>)  $\delta$  9.63-8.10 (m, 4H), 3.90 (t,  $J$  = 84.9 Hz, 16H), 3.47 (d,  $J$  = 46.1 Hz, 32H), 3.19 (s, 4H), 3.09 – 2.79 (m, 8H), 2.78 – 2.32 (m, 8H), 1.75 (s, 8H), 1.25 (s, 72H), 0.88 (t,  $J$  = 6.7 Hz, 12H).

**$G_2$ QPAMC<sub>12</sub>:** <sup>1</sup>H NMR (400 MHz, CDCl<sub>3</sub>)  $\delta$  9.45-8.39 (m, 8H), 8.05 (s, 4H), 3.74 (s, 32H), 3.51 (s, 24H), 3.32 (d,  $J$  = 16.6 Hz, 48H), 2.46-2.75 (t, 40H), 1.74-2.01 (s, 36H), 1.25-1.35 (m, 144H), 0.88 (t,  $J$  = 6.9 Hz, 24H).

**$G_3$ QPAMC<sub>12</sub>:** <sup>1</sup>H NMR (400 MHz, CDCl<sub>3</sub>)  $\delta$  8.72 (d,  $J$  = 60.5 Hz, 16H), 8.09 (s, 8H), 7.93 (s, 4H), 3.59 (d,  $J$  = 111.3 Hz, 120H), 3.31 (d,  $J$  = 38.3 Hz, 96H), 2.75 (s, 56H), 2.62 – 2.21 (m, 80H), 1.74 (s, 36H), 1.28 (d,  $J$  = 41.4 Hz, 288H), 0.86 (t,  $J$  = 6.6 Hz, 48H).

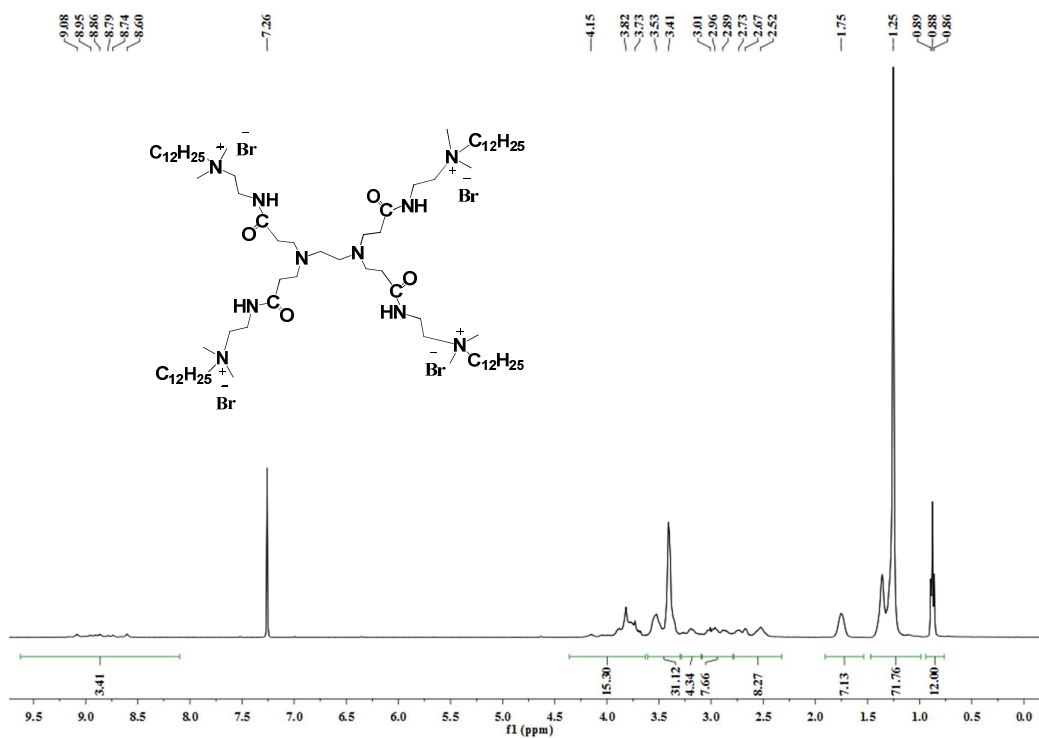

**Figure S1.** characterization data of  $G_1QPAMC_{12}$  by  $^1H$  NMR.

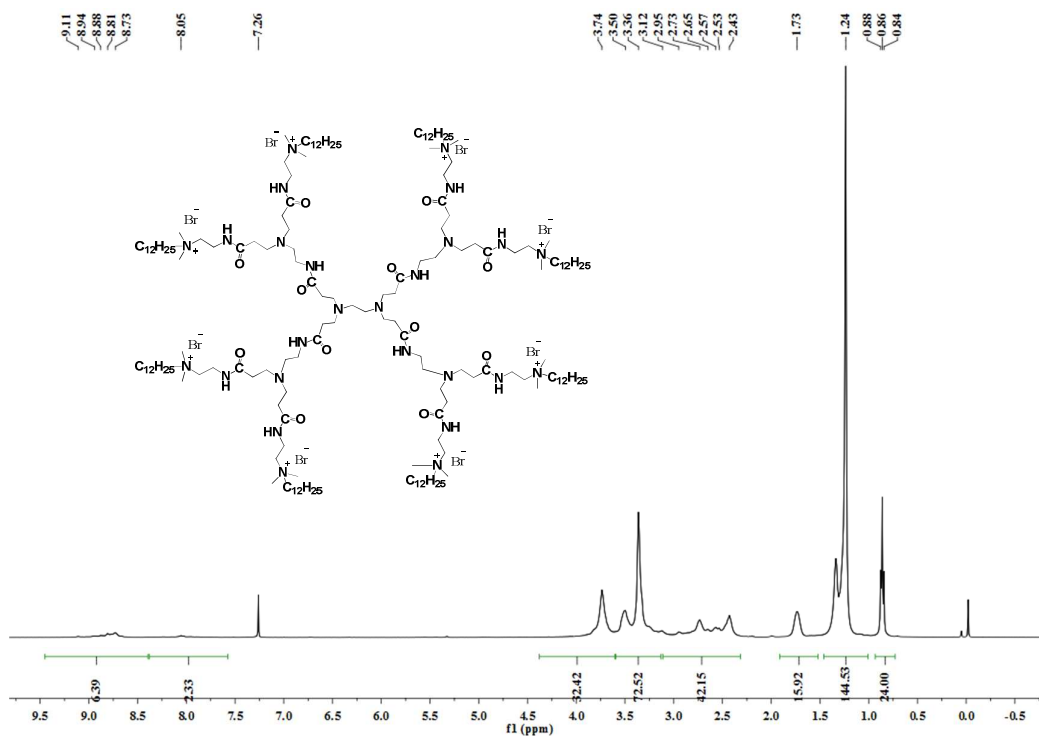

**Figure S2.** characterization data of  $G_2QPAMC_{12}$  by  $^1H$  NMR.

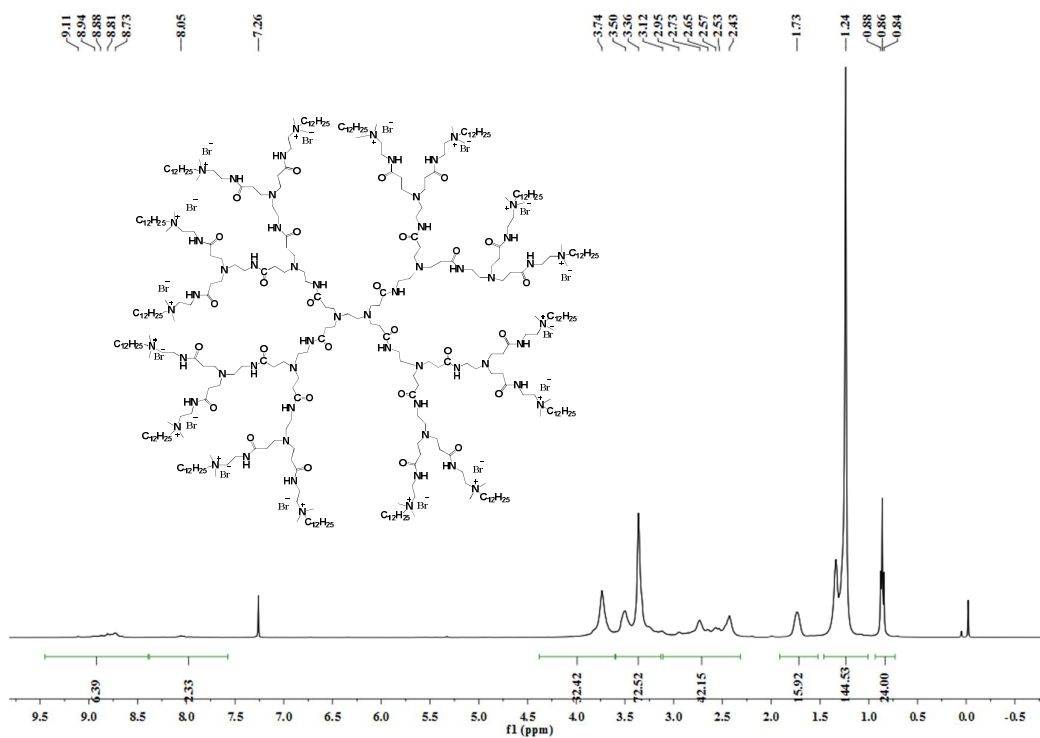

**Figure S3.** characterization data of  $G_3QPAMC_{12}$  by  $^1H$  NMR.

## 1.2. DLS Measurment

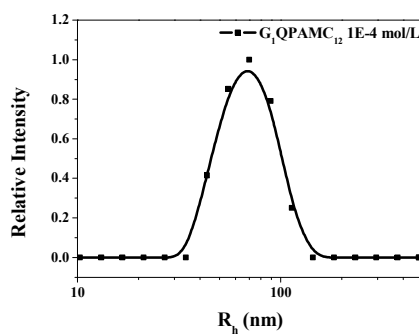

**Figure S4.** DLS measurements of the size distribution of  $G_1QPAMC_{12}$  at  $1E-4$  mol/L.
